# Supplementary material for: A nested case-control study of 277 prediagnostic serum cytokines and glioma
Source: PLoS One. 2017 Jun 8;12(6):e0178705. doi: 10.1371/journal.pone.0178705 (PMC5464586; doi:10.1371/journal.pone.0178705)
Supplement: S3 Table — (DOCX) [file pone.0178705.s006.docx]

**Supplemental Table 3. Case and control means and 95% confidence intervals of standardized logs of serum cytokine levels (within 5 years before diagnosis).**

**Cases Controls**

| **Variable** | **N** | **Mean** | **Lower 95% CL for Mean** | **Upper 95% CL for Mean** |
| --- | --- | --- | --- | --- |
| | **KITLG** | | --- | | **sGCSFR** | | **sGMCSFR** | | **MIF** | | **FGFbasic** | | **VEGF** | | **EGF** | | **TGFbeta1** | | **TGFalpha** | | **IL10** | | **IL6** | | **IL1beta** | | | 55 | | --- | | 55 | | 55 | | 55 | | 55 | | 55 | | 55 | | 55 | | 55 | | 55 | | 55 | | 55 | | | -0.16 | | --- | | -0.06 | | -0.06 | | -0.11 | | 0.02 | | -0.02 | | -0.04 | | 0.04 | | -0.05 | | -0.04 | | -0.02 | | -0.12 | | | -0.45 | | --- | | -0.33 | | -0.34 | | -0.42 | | -0.28 | | -0.30 | | -0.33 | | -0.25 | | -0.34 | | -0.34 | | -0.29 | | -0.38 | | | 0.14 | | --- | | 0.22 | | 0.23 | | 0.19 | | 0.31 | | 0.25 | | 0.25 | | 0.33 | | 0.25 | | 0.26 | | 0.25 | | 0.14 | |

| **Variable** | **N** | **Mean** | **Lower 95% CL for Mean** | **Upper 95% CL for Mean** |
| --- | --- | --- | --- | --- |
| | **KITLG** | | --- | | **sGCSFR** | | **sGMCSFR** | | **MIF** | | **FGFbasic** | | **VEGF** | | **EGF** | | **TGFbeta1** | | **TGFalpha** | | **IL10** | | **IL6** | | **IL1beta** | | | 55 | | --- | | 55 | | 55 | | 55 | | 55 | | 55 | | 55 | | 55 | | 55 | | 55 | | 55 | | 55 | | | -0.05 | | --- | | -0.21 | | -0.22 | | -0.17 | | -0.04 | | -0.01 | | -0.23 | | -0.06 | | -0.08 | | -0.13 | | -0.15 | | -0.15 | | | -0.32 | | --- | | -0.44 | | -0.45 | | -0.39 | | -0.34 | | -0.30 | | -0.45 | | -0.29 | | -0.30 | | -0.30 | | -0.38 | | -0.36 | | | 0.23 | | --- | | 0.01 | | 0.01 | | 0.04 | | 0.26 | | 0.28 | | -0.00 | | 0.17 | | 0.14 | | 0.05 | | 0.08 | | 0.06 | |
